# Supplementary material for: Functional polyaniline-assisted decoration of polystyrene microspheres with noble metal nanoparticles and their enhanced catalytic properties
Source: Royal Society of Chemistry journal article supplement (doi:10.1039/c6nj02200f), 2016-01-01
Supplement: c6nj02200f1.pdf [file c6nj02200f1.pdf]

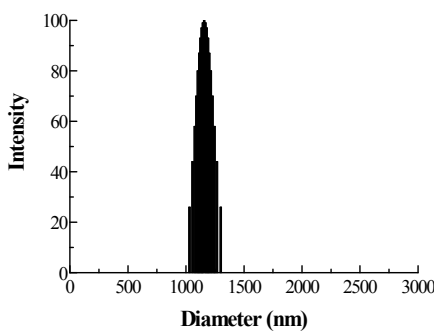

Fig. S1 DLS spectrum of prepared PS microspheres.

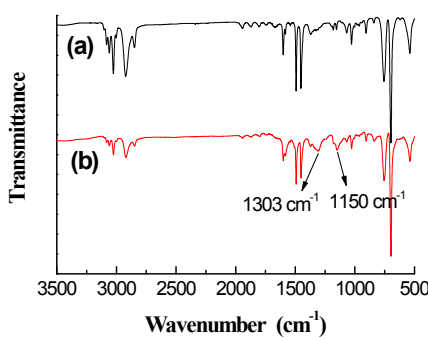

Fig. S2 FTIR spectra of PS microspheres (a) and PS/PANi composite particles (b).

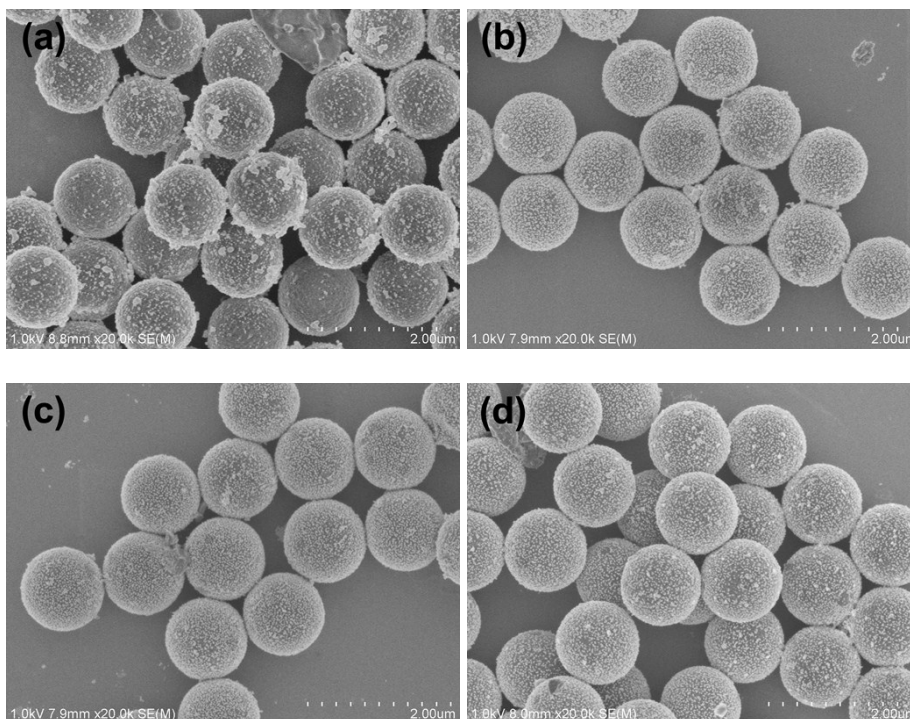

Fig. S3 SEM images of PS/PANi-Au composite particles prepared by mixing the PS/PANi composite particles and Au NPs in water at different pH, (a) 2; (b) 3; (c) 4; (d) 5.

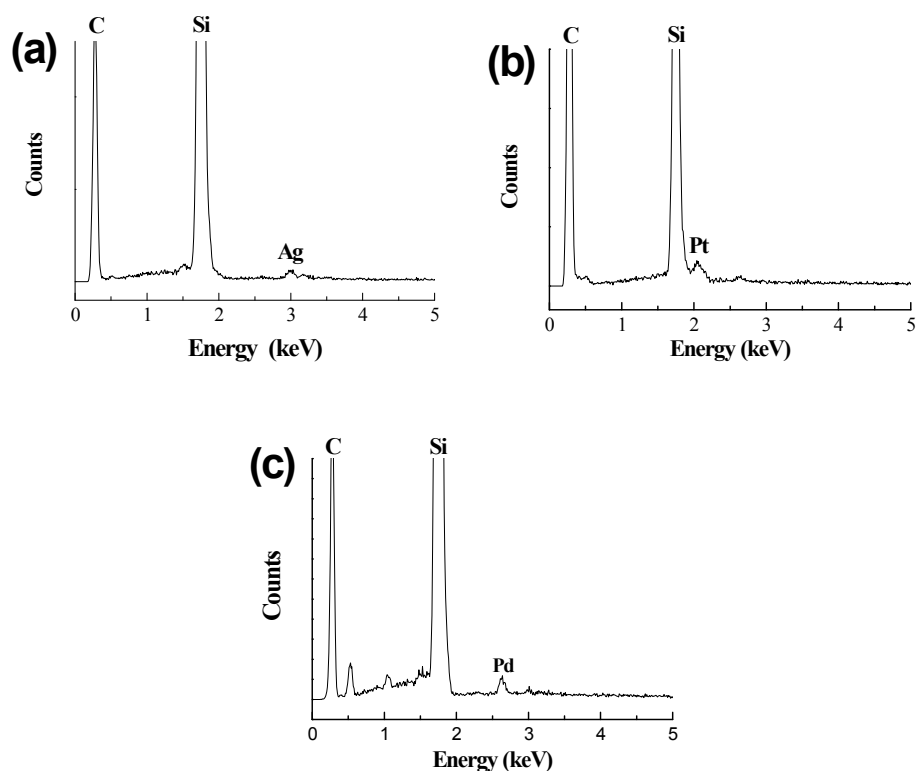

Fig. S4 EDX spectra of PS/PANi-Ag (a), PS/PANi-Pt (b), and PS/PANi-Pd (c) composite particles.

### Calculation of the content of Au NPs according to the results of TGA performed in N<sub>2</sub>

Based on the TGA curve of PS/PANi composite particles, we can obtain the weight ratio ( $w = m_1/m_2$ ) of the residual carbon-rich materials ( $m_1$ ) derived from PANi and the decomposed component ( $m_2$ ) consisting of PS microspheres and partial PANi. As for the PS/PANi-Au composite particles, the residual weight was composed of corresponding carbon-rich materials and Au NPs, and the decomposed part was identical to the case of PS/PANi composite particles. Thus, on the basis of the value

of  $w$ , the weight percentage of carbon-rich materials in the residue owing to the decomposition of PS/PANi-Au composite particles can be determined. Afterward, the content of Au NPs in the three-component composite particles can be obtained by subtracting the weight percentage of carbon-rich materials from the weight percentage of carbon-rich materials and Au NPs.
